# Supplementary material for: Evidence of Small Fungal Cysteine-Rich Proteins Acting as Biosurfactants and Self-Assembling into Large Fibers
Source: MDPI journal article supplement (doi:10.3390/ijms241813843), 2023-09-08
Supplement: s1 [file s1]

# Evidence of small fungal cysteine-rich proteins acting as biosurfactants and self-assembling into large fibers.

Rossana Pitocchi<sup>1</sup>, Ilaria Stanzione<sup>1</sup>, Anna Illiano<sup>1</sup>, Angela Amoresano<sup>1</sup>, Oreste Tarallo<sup>1</sup>, Paola Cicatiello<sup>1\*</sup>, Alessandra Piscitelli<sup>1</sup>, Paola Giardina<sup>1</sup>

<sup>1</sup> Department of Chemical Sciences, University of Naples Federico II, Via Cintia, 80126 Naples, Italy.

\* Correspondence: [paola.cicatiello@unina.it](mailto:paola.cicatiello@unina.it); Tel. +3908174327

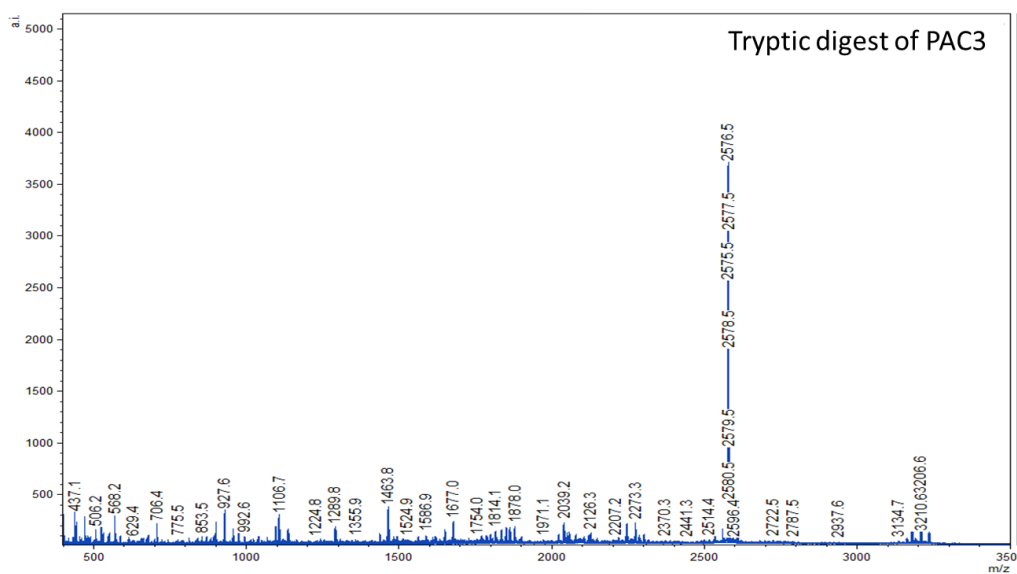

**Figure S1.** MALDI-MS spectrum of tryptic peptides of PAC3 acquired in the range 400 - 3500 m/z.

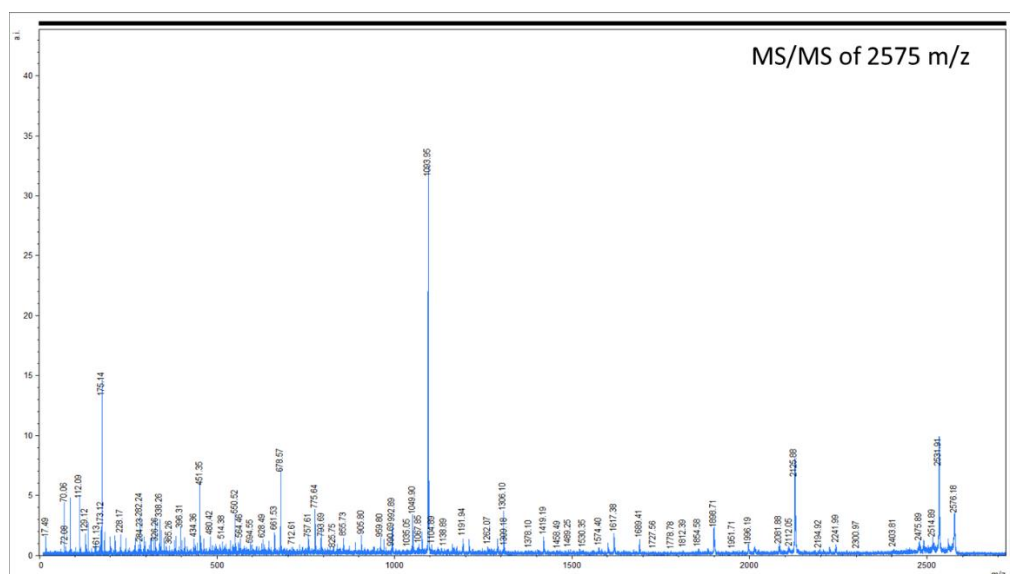

**Figure S2.** MALDI MS-MS fragmentation spectrum of the 2575 m/z PAC3 tryptic peptide (named peptide 1).



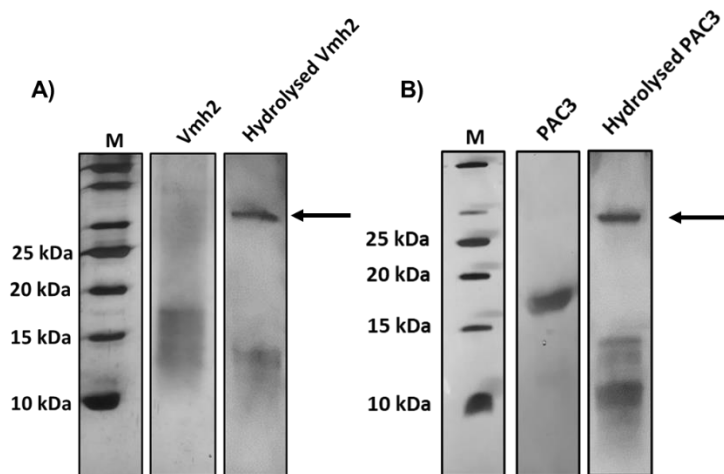

**Figure S6.** SDS-PAGE before (first lane) and after hydrolysis (second lane) of Vmh2 (A) and Pac3 (B) with Proteinase K, indicated in the figure by the arrows.

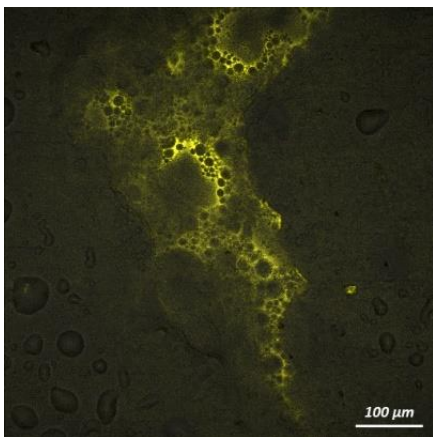

**Figure S7.** Emulsions of PAC3 solution (0.05 mg/ml) containing 3 $\mu$ M ThT mixed with Dectol (2:1 v/v), analysed by confocal laser microscopy. Image was acquired depositing the foam on a glass slide and drying at RT.
